CORRECTION

# Correction: SIRT1 Is a Regulator in High Glucose-Induced Inflammatory Response in RAW264.7 Cells

The *PLOS ONE* Staff

The first four authors, Yanhui Jia, Zhao Zheng, Yunchuan Wang, and Qin Zhou, should be noted as contributing equally to this work. Weixia Cai is not included in this group of equal contributors.

## Reference

1. Jia Y, Zheng Z, Wang Y, Zhou Q, Cai W, Jia W, et al. (2015) SIRT1 Is a Regulator in High Glucose-Induced Inflammatory Response in RAW264.7 Cells. *PLoS ONE* 10(3): e0120849. doi: [10.1371/journal.pone.0120849](https://doi.org/10.1371/journal.pone.0120849) PMID: [25793995](https://pubmed.ncbi.nlm.nih.gov/25793995/)

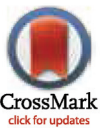

## OPEN ACCESS

**Citation:** The *PLOS ONE* Staff (2015) Correction: SIRT1 Is a Regulator in High Glucose-Induced Inflammatory Response in RAW264.7 Cells. *PLoS ONE* 10(5): e0127605. doi:10.1371/journal.pone.0127605

**Published:** May 4, 2015

**Copyright:** © 2015 The PLOS ONE Staff. This is an open access article distributed under the terms of the [Creative Commons Attribution License](https://creativecommons.org/licenses/by/4.0/), which permits unrestricted use, distribution, and reproduction in any medium, provided the original author and source are credited.
